# Supplementary material for: Ln–Pt electron polarization effects on the magnetic relaxation of heterometallic Ho– and Er–Pt complexes
Source: Royal Society of Chemistry journal article supplement (doi:10.1039/c8dt03338b), 2018-09-10
Supplement: c8dt03338b1.pdf [file c8dt03338b1.pdf]

## Ln-Pt Electron Polarization Effects on the Magnetic Relaxation of Heterometallic Ho- and Er-Pt Complexes

Takefumi Yoshida<sup>†,!,\*</sup> David C. Izuogu,<sup>†,‡</sup> Hai-Tao Zhang,<sup>†</sup> Goulven Cosquer,<sup>†,#</sup> Hitoshi Abe,<sup>‡,§</sup> Wolfgang Wernsdorfer,<sup>‡</sup> Brian K. Breedlove,<sup>†,#</sup> Masahiro Yamashita<sup>\*,†,¶,||</sup>

<sup>†</sup>*Department of Chemistry, Graduate School of Science, Tohoku University, 6-3 Aza-Aoba, Aramaki, Sendai 980-8578, Japan*

<sup>‡</sup>*Department of Pure & Industrial Chemistry, University of Nigeria, 410001, Nsukka, Nigeria*

<sup>|</sup>*WPI-Advanced Institute for Materials Research, Tohoku University, 2-1-1 Katahira, Sendai 980-8577, Japan*

<sup>¶</sup>*School of Materials Science and Engineering, Nankai University, Tianjin 300350, China*

<sup>||</sup>*Institute of Materials Structure Science High Energy Accelerator Research Organization (KEK) 1-1 Oho, Tsukuba, Ibaraki 305-0801, Japan*

<sup>§</sup>*Department of Materials Structure Science, School of High Energy Accelerator Science, SOKENDAI (the Graduate University for Advanced Studies) 1-1 Oho, Tsukuba, Ibaraki 305-0801, Japan*

<sup>¶</sup>*Physikalisches Institut, Karlsruher Institut für Technologie Wolfgang-Gaede-Str. 1, D-76131 Karlsruhe, Germany*

<sup>!</sup>*Present address: Takefumi Yoshida: Electronic Functional Macromolecules Group, National Institute for Materials Science, 1-1 Namiki, Tsukuba, Japan. (YOSHIDA.Takefumi@nims.go.jp).*

## Experimental.

**General Information.** Holmium chloride, and Erbium chloride were obtained from Strem Chemicals Inc. and used as received. *S*-potassium thioacetate was obtained from Tokyo chemical industry co., Ltd. and used as received. Every synthetic process were operated under air atmosphere.

**Synthesis of  $[\text{Ln}_2\text{Pt}_3(\text{H}_2\text{O})_2(\text{SAc})_{12}]$ .**  $[\text{Ln}_2\text{Pt}_3(\text{H}_2\text{O})_2(\text{SAc})_{12}]$  (Ln = Ho, Er) were obtained from aqueous solutions (20 ml) with Ln(III)Cl<sub>3</sub>·*n*H<sub>2</sub>O (55 mg:  $\sim 2.2 \times 10^{-1}$  mmol, *n* = 6 or 7), K<sub>2</sub>PtCl<sub>4</sub> (90 mg:  $2.2 \times 10^{-1}$  mmol), and K(SAc) (100 mg:  $8.8 \times 10^{-1}$  mmol) at 60°C. Half of or one hour later, we got the single crystals. They were separated from mother liquor by decantation using water and filtered.

**$[\text{Ho}_2\text{Pt}_3(\text{ASc})_{12}(\text{H}_2\text{O})_2]$  (1).** Yield: 80 mg (39%). Elemental analysis: C<sub>24</sub>H<sub>40</sub>O<sub>14</sub>S<sub>12</sub>Ho<sub>2</sub>Pt<sub>3</sub>; cal.: C, 15.56; H, 2.18; S, 20.77. Found: C, 15.847; H, 2.014; S, 20.84. IR spectrum (ATR, cm<sup>-1</sup>): 3548(m), 3495(m), 1579(s), 1528(s), 1419(m), 1351(m), 1137(s), 967(m), 703(m).

**$[\text{Er}_2\text{Pt}_3(\text{ASc})_{12}(\text{H}_2\text{O})_2]$  (2).** Yield: 45 mg (22%). Elemental analysis: C<sub>24</sub>H<sub>40</sub>O<sub>14</sub>S<sub>12</sub>Er<sub>2</sub>Pt<sub>3</sub>; cal.: C, 15.52; H, 2.18; S, 20.69. Found: C, 15.686; H, 2.041; S, 20.40. IR spectrum (ATR, cm<sup>-1</sup>): 3584(m), 3486(m), 1571(s), 1501(s), 1409(m), 1345(m), 1210(s), 1144(s), 976(m), 690(m).

**Characterization and Instrumental Procedures.** Single-crystal X-ray diffraction data were collected on a Bruker APEX-II diffractometer with a PHOTON 100 CMOS detector and JAPAN thermal Engineering Co., Ltd Cryo system DX-CS190LD. All of the collection details were written on each CIF file. The elemental analysis performed on J-SCIENCE LAB CO., Ltd. JM-11 microanalyzer. FT-IR spectra of the single crystal were acquired on a JASCO FT/IR 6700 spectrometer using an ATR method. Powder X-ray diffraction patterns were acquired on a Bruker D2 Phaser.

**Calculation details.** NBO and LOL analyses were performed on Gaussian09 program package. The molecular structure of model made from crystal structure of **2** and simplified on GaussView5.0. The B3LYP functional<sup>S1</sup> was used with Def2-TZVP basis set including Effective Core Potential.<sup>S2</sup> The SCF procedure performed on verytight condition. Ultrafine integration grid was used for integration. Publication materials visualized by GaussView5.0.

**X-ray Absorption Fine Structure Measurements.** X-ray absorption fine structure was collected on a handmade measurement system on the BL9A beamline in the Photon Factory of the High Energy Accelerator Research Organization (KEK, Proposal No. 2017P016). XANES analysis were done by using Demeter 0.9.25 package.<sup>S3</sup>

**Magnetic Susceptibility Measurements.** DC and AC magnetic susceptibility measurements were performed on solid polycrystalline and single-crystal samples on Quantum Design MPMS-XL SQUID magnetometer, and a Quantum Design PPMS-6000 physical property measurement system in applied dc fields of 3000 Oe.

**Table 1.** crystal data of **1** and **2**.

|                                                      | <b>1</b>                                                                                        | <b>2</b>                                                                                        |
|------------------------------------------------------|-------------------------------------------------------------------------------------------------|-------------------------------------------------------------------------------------------------|
| Temperature / K                                      | RT                                                                                              | 93                                                                                              |
| formula                                              | C <sub>24</sub> H <sub>40</sub> O <sub>14</sub> S <sub>12</sub> Ho <sub>2</sub> Pt <sub>3</sub> | C <sub>24</sub> H <sub>40</sub> O <sub>14</sub> S <sub>12</sub> Er <sub>2</sub> Pt <sub>3</sub> |
| crystal system                                       | Triclinic                                                                                       | Triclinic                                                                                       |
| space group                                          | <i>P</i> $\bar{1}$                                                                              | <i>P</i> $\bar{1}$                                                                              |
| <i>a</i> / Å                                         | 8.443(5)                                                                                        | 8.336(6)                                                                                        |
| <i>b</i> / Å                                         | 11.781(7)                                                                                       | 11.594(8)                                                                                       |
| <i>c</i> / Å                                         | 12.701(7)                                                                                       | 12.718(9)                                                                                       |
| $\alpha$ / °                                         | 83.155(10)                                                                                      | 82.957(2)                                                                                       |
| $\beta$ / °                                          | 73.837(2)                                                                                       | 74.002(2)                                                                                       |
| $\gamma$ / °                                         | 76.145(10)                                                                                      | 75.934(2)                                                                                       |
| <i>V</i> / Å <sup>3</sup>                            | 1176.27(12)                                                                                     | 1144.1(14)                                                                                      |
| <i>Z</i>                                             | 1                                                                                               | 1                                                                                               |
| <i>R</i> <sub>1</sub> ( <i>I</i> > 2σ ( <i>I</i> ))  | 3.37%                                                                                           | 3.50%                                                                                           |
| <i>wR</i> <sub>2</sub> ( <i>I</i> > 2σ ( <i>I</i> )) | 7.46%                                                                                           | 5.83%                                                                                           |

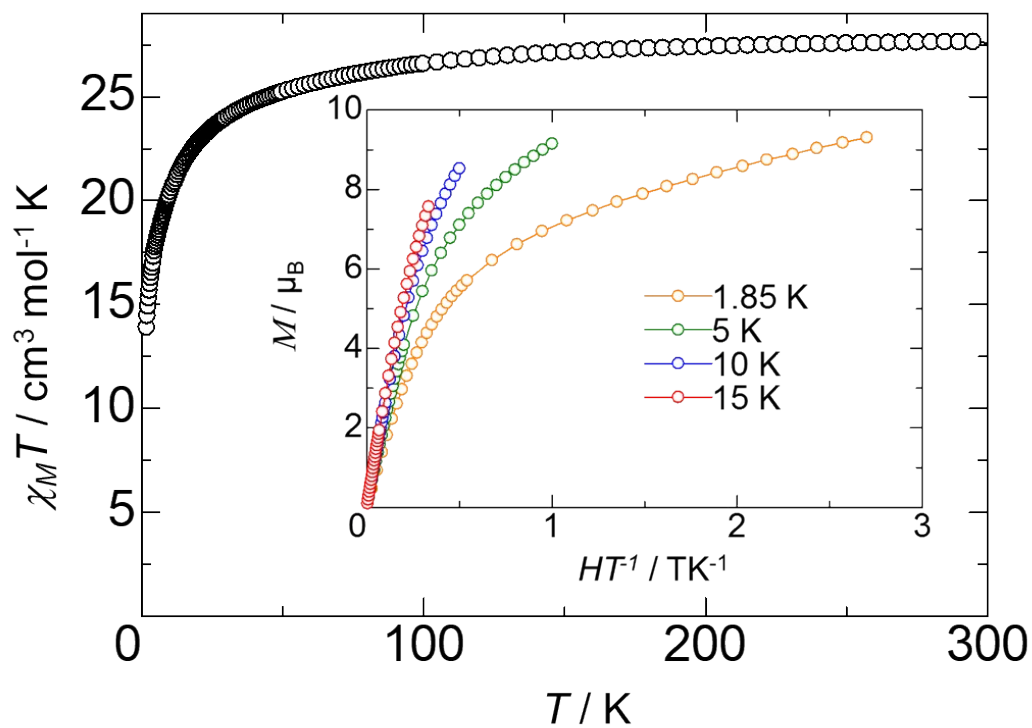

Figure S1.  $\chi_M T$  vs.  $T$  plots for **1** in a  $dc$  field of 3000 Oe.

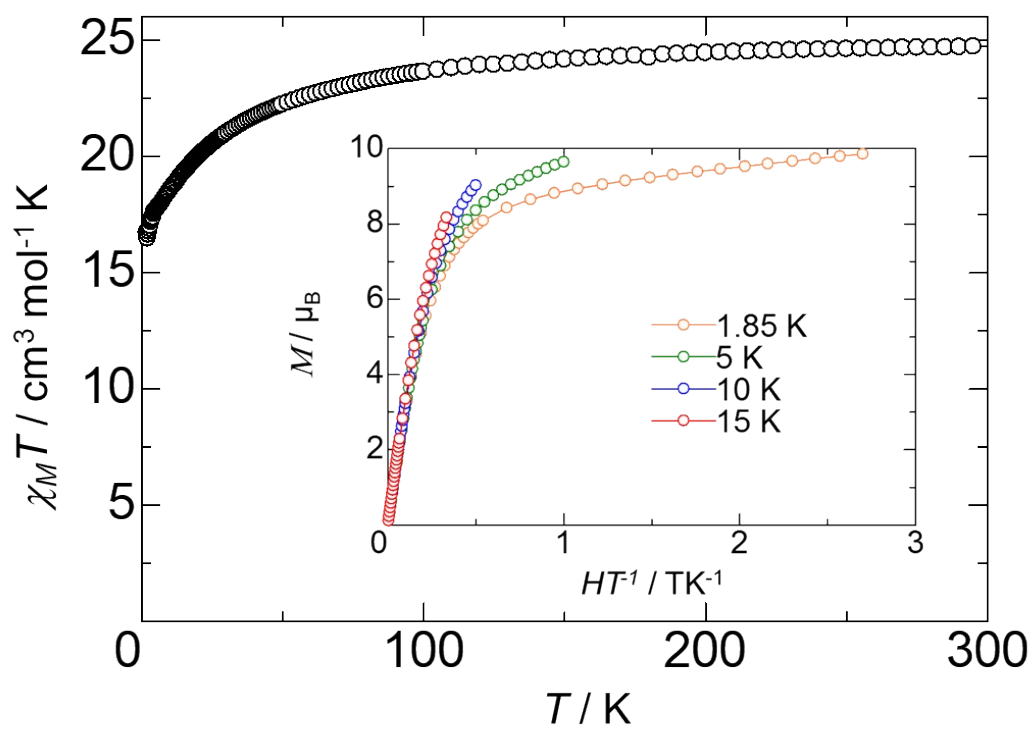

Figure S2.  $\chi_M T$  vs.  $T$  plots for **2** in a  $dc$  field of 3000 Oe.

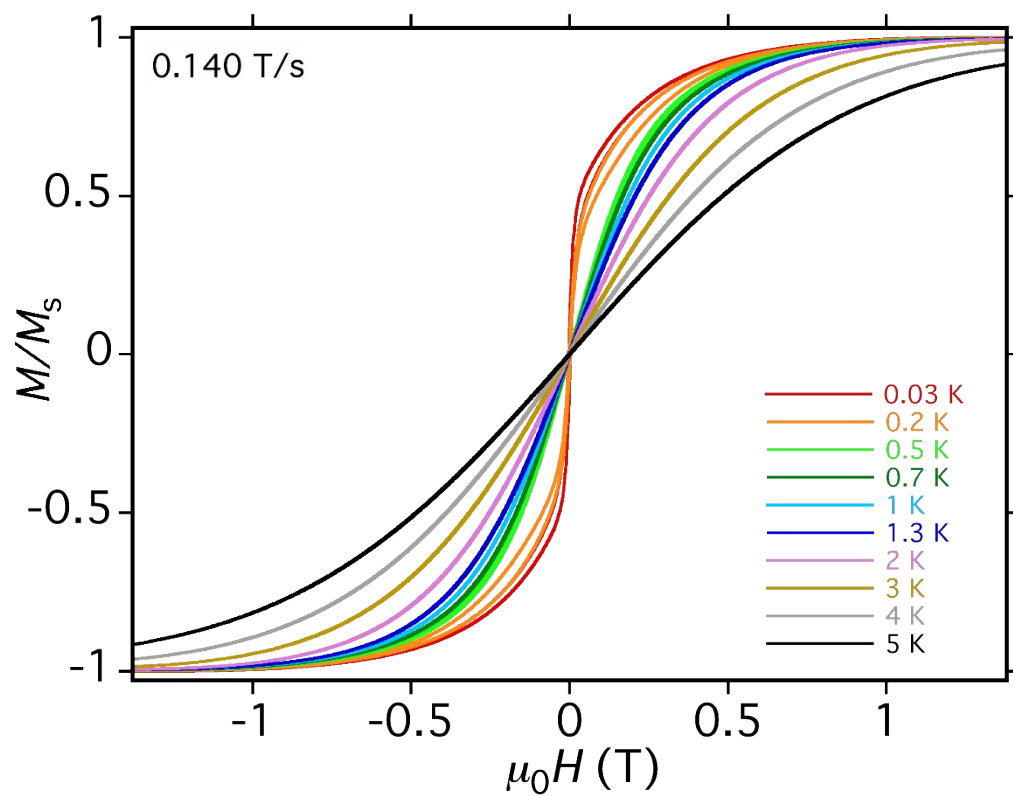

Figure S3. The magnetization vs. field plots of **1** in the  $T$  range of 0.03–5 K at a scan rate of 0.140 T/s.

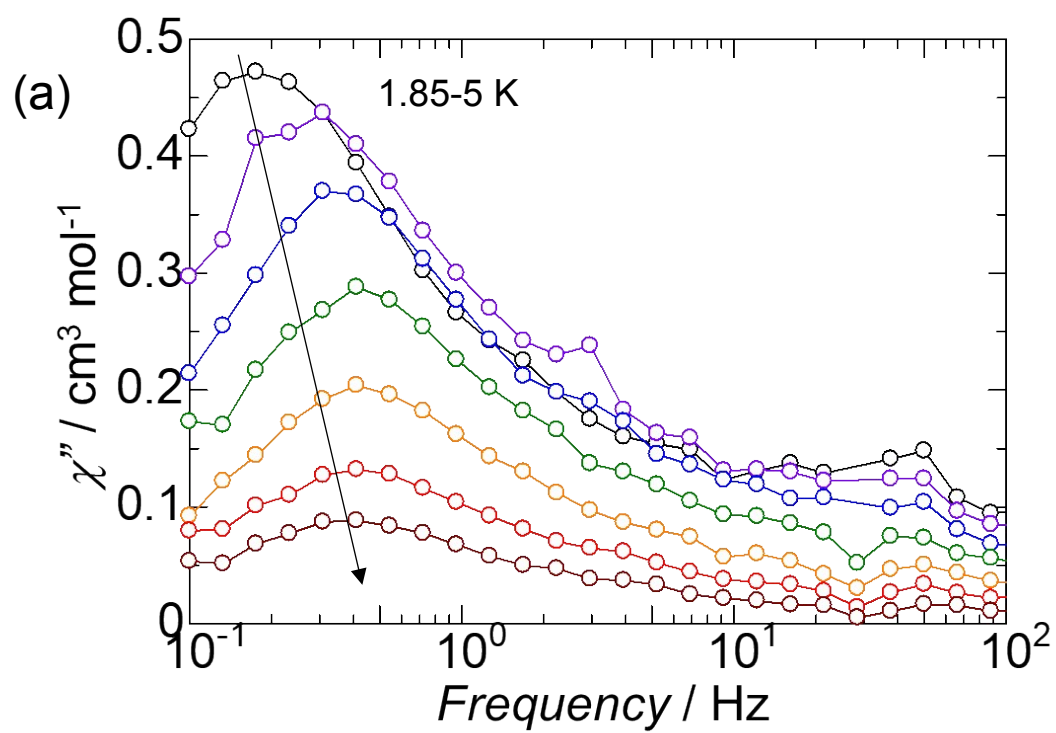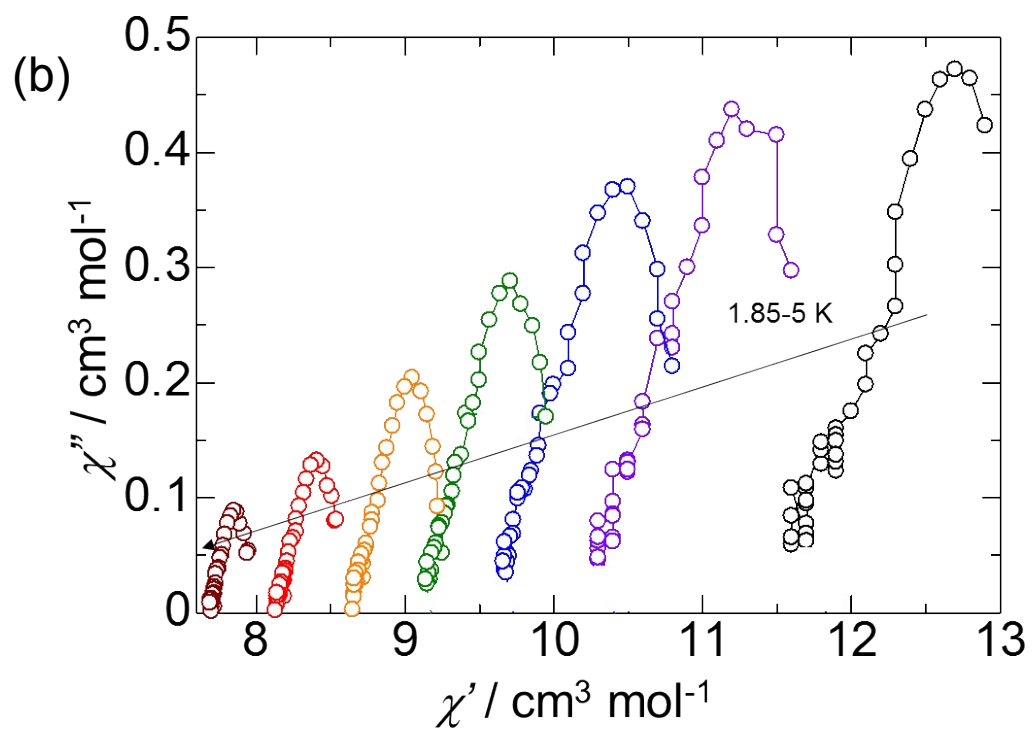

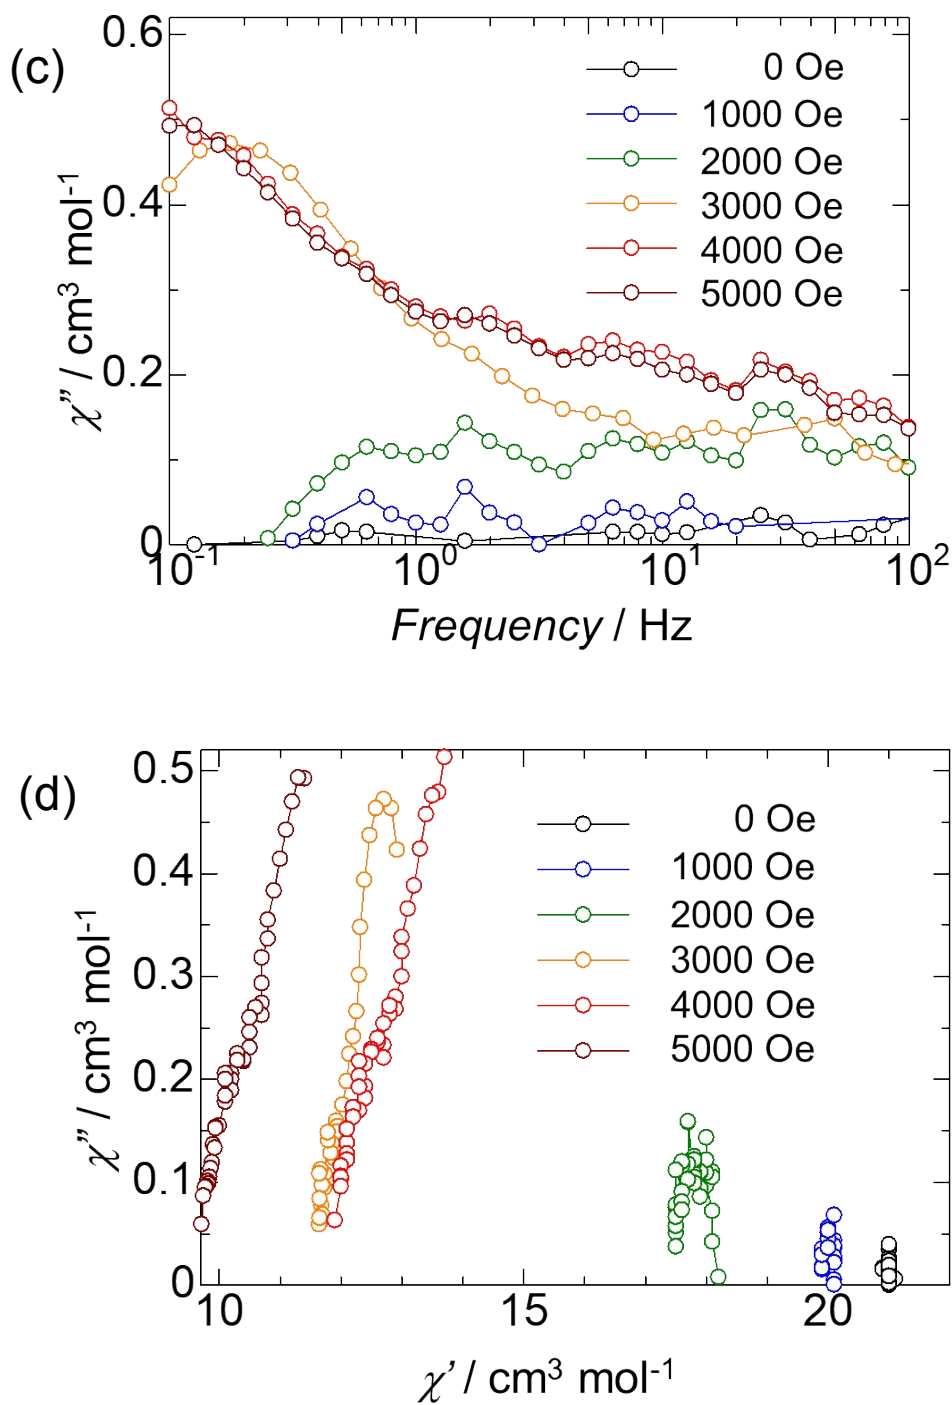

Figure S4. (a)  $\chi''_{\text{M}}$  vs.  $T$  plots for **1** in a field of 3000 Oe and  $T$  range of 1.85–5K at 0.5 K per step. (b) Cole-Cole plots for **1** in a field of 3000 Oe and  $T$  range of 1.85–5K at 0.5 K per step. (c)  $\chi''$  versus frequency plots for powder sample for **1** in various fields at 1.85 K. (d) Cole-Cole plots for **1** in various fields at 1.85 K.



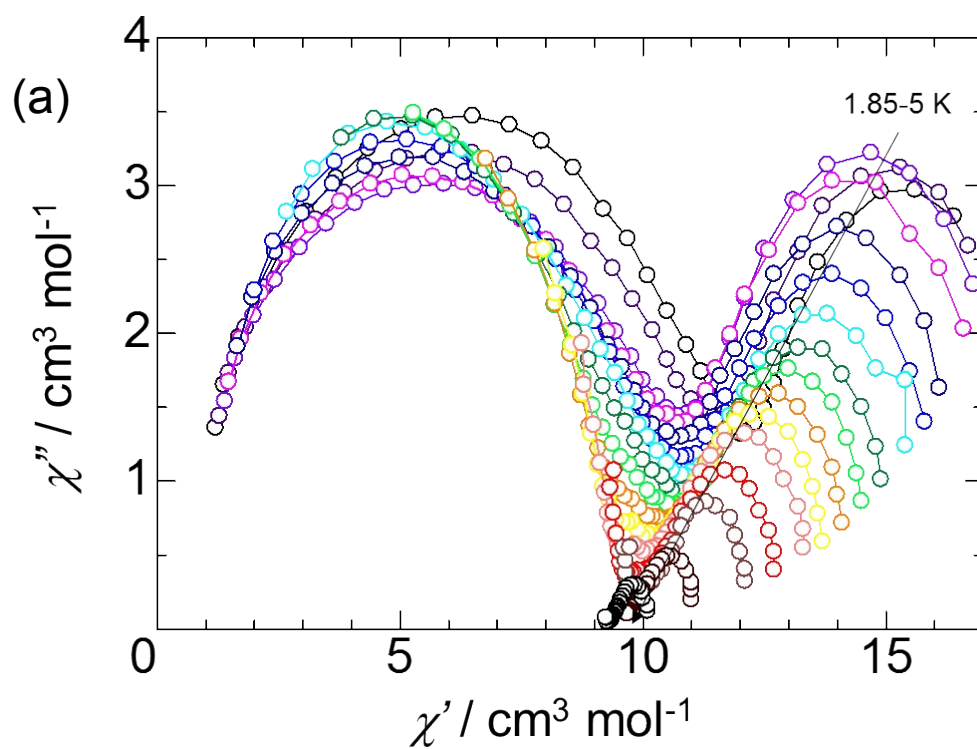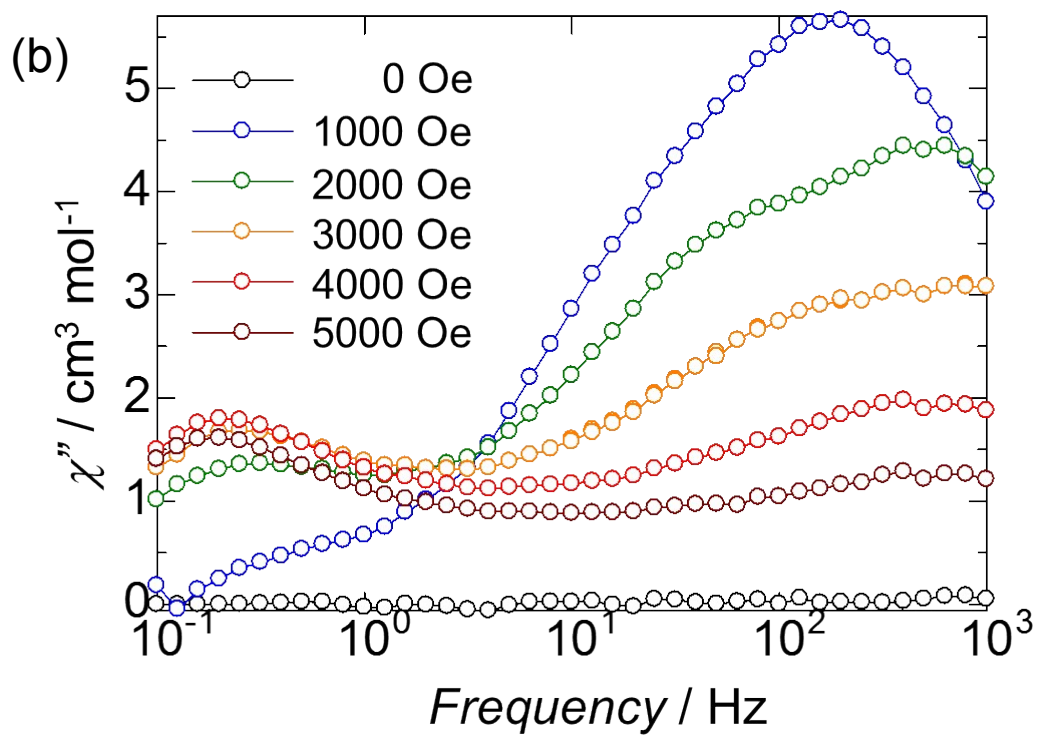

(c)

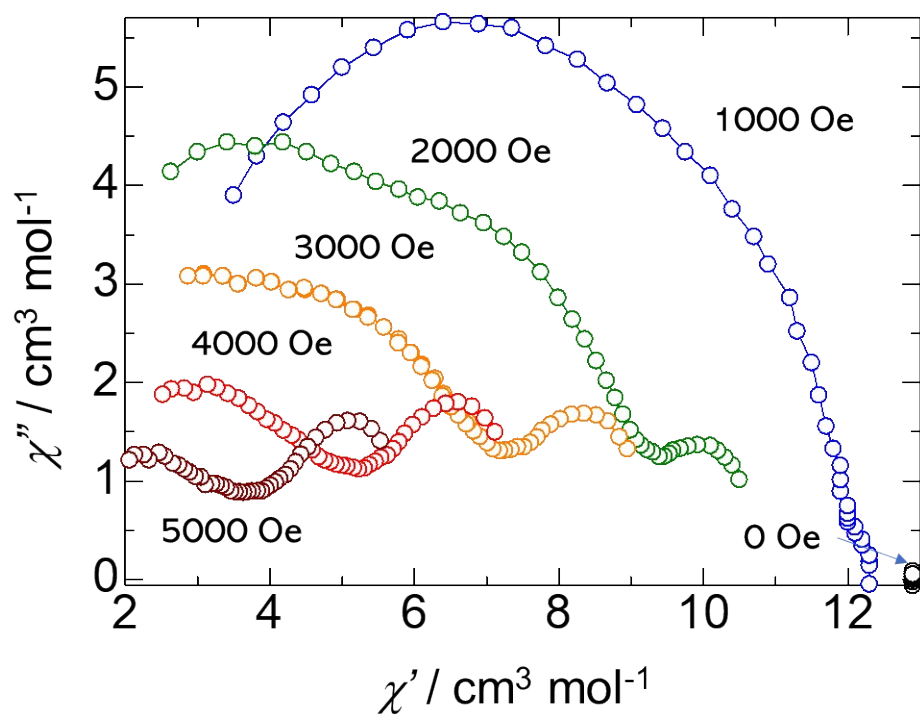

Figure S5. (a) Cole-Cole plots for **2** in a field of 3000 Oe and  $T$  range of 1.85–3.5 K at 0.15 K per step, 3.75–4 K at 0.25 K per step, and 4–5 K at 0.5 K per step. (b)  $\chi''$  versus frequency plots for powder sample for **2** in various fields at 1.85 K. (c) Cole-Cole plots for **2** in various fields at 1.85 K.

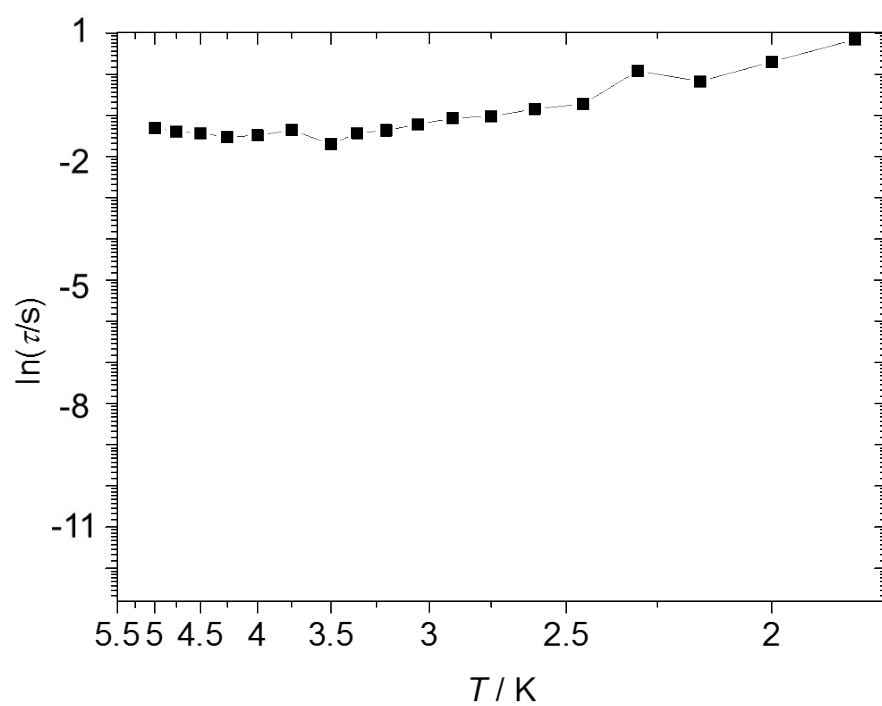

Figure S6.  $\ln(\tau)$  vs.  $T^{-1}$  plots for **1**.

## References

- [S1] P.J. Stephens, F.J. Devlin, C.F. Chabalowski, M.J. Frisch, *J. Phys. Chem.*, 1994, **98**, 11623-11627.
- [S2] F. Weigend and R. Ahlrichs; *Phys. Chem. Chem. Phys.* 2005, **7**, 3297-3305.
- [S3] B. Ravel and M. Newville, *J. Synchrotron Rad.*, 2005, **12**, 537-541.
